# Supplementary material
Source: Research Square preprint supplement (doi:10.21203/rs.3.rs-10182484/v1)
Supplement: Supplementary file 1 [file 9b15304524c12b5e42b05f43.docx]

**Supplementary Materials**

Supplementary materials providing additional ecological, taxonomic, and statistical analyses are presented below.

**Supplementary Table S1: Post hoc pairwise comparison results following Kruskal–Wallis testing of fungal alpha diversity across decomposition stages**

| **Stages of Decomposition** | **Fresh** | **Bloat** | **Active Decay** | **Advanced Decay** | **Dry / Remains** | **Control_ Fresh** | **Control_ Bloat** | **Control_ Active_ Decay** | **Control_ Advanced_ Decay** | **Control_ Dry / Remains** |
| --- | --- | --- | --- | --- | --- | --- | --- | --- | --- | --- |
| **Fresh** | *0* | *-* | *p = 0.04* | *p = 0.04* | *p = 0.04* | - | - | - | - | - |
| **Bloat** |  | *0* | *-* | *-* | *-* | - | - | - | - | - |
| **Active Decay** | *p = 0.04* | *-* | *0* | *-* | *-* | - | - | - | - | - |
| **Advanced Decay** | *p = 0.04* | *-* | *-* | *0* | *-* | - | - | - | - | - |
| **Dry/Remains** | *p = 0.04* | *-* | *-* | *-* | *0* | - | - | - | - | - |
| **Control_Fresh** | - | - | - | - | - | 0 | - | - | - | - |
| **Control_ Bloat** | - | - | - | - | - | 0 | 0 | - | - | - |

**Supplementary Table S2: Soil pH and moisture measurements recorded for control soil samples throughout the sampling period.**

| **PMI (Days)** | **pH** | **Moisture (%)** |
| --- | --- | --- |
| 0 | 4.87 | 3.96 |
| 1 | 6.46 | 8.88 |
| 4 | 6.21 | 6.76 |
| 5 | 7.23 | 7.93 |
| 8 | 6.51 | 4.12 |
| 13 | 7.44 | 10.95 |
| 18 | 7.46 | 4.87 |
| 42 | 5.89 | 4.12 |
| 63 | 5.56 | 9.09 |

**Supplementary Figures**

**
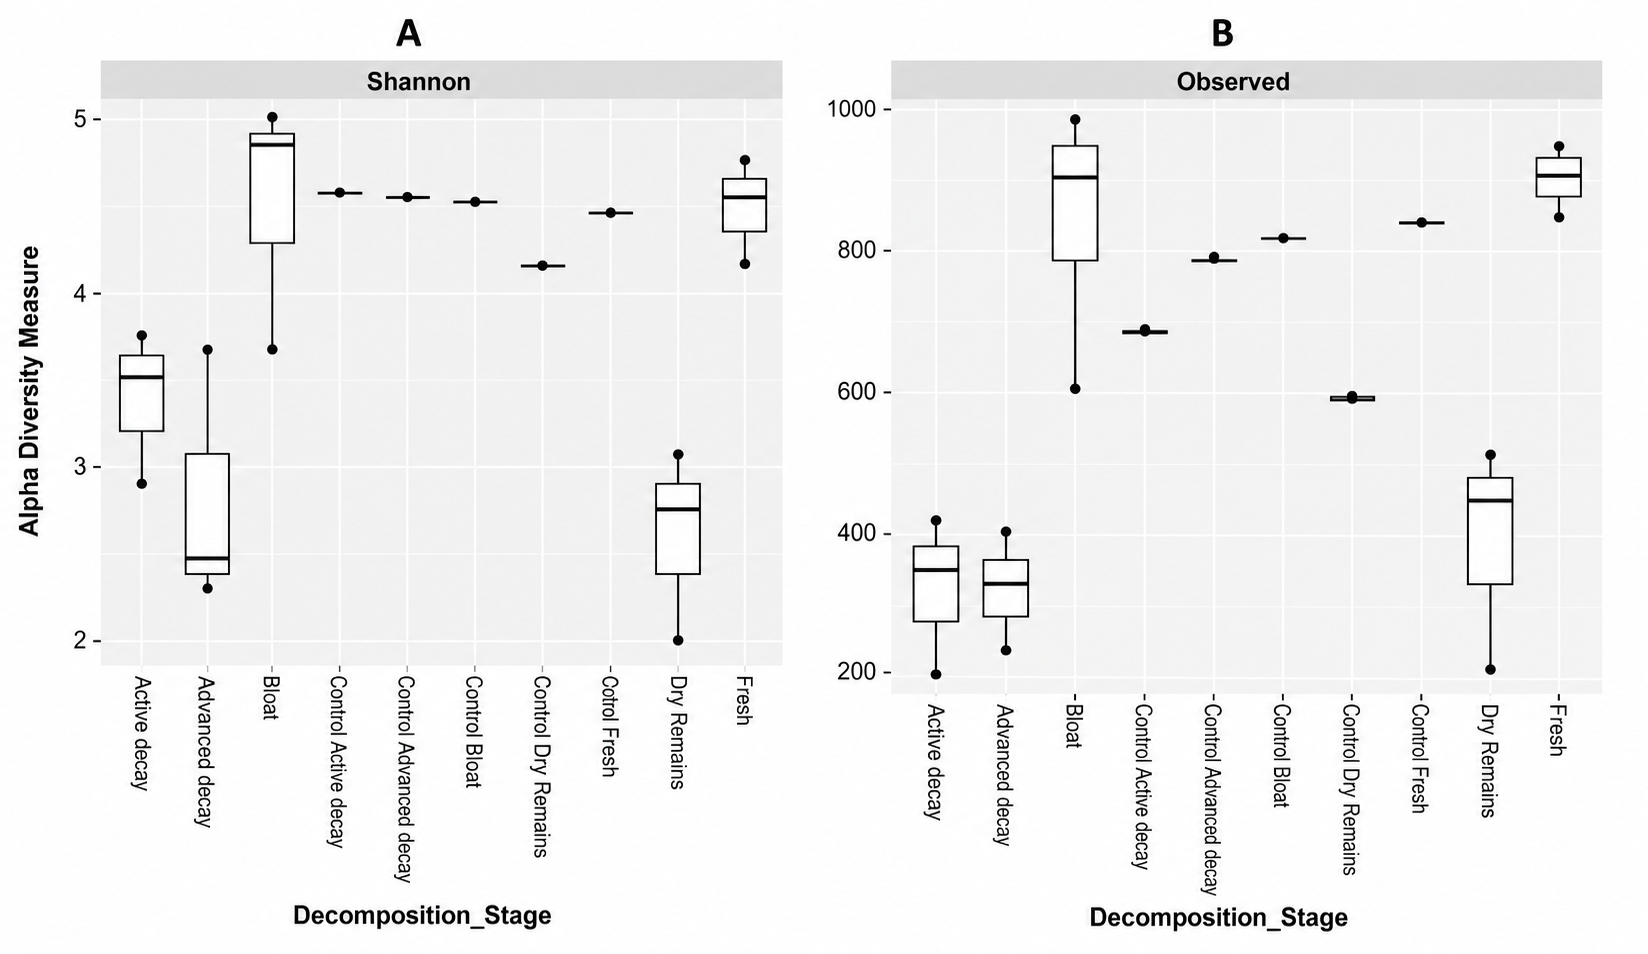
**

**Supplementary Fig. S1** Boxplots of Shannon diversity (A) and observed taxonomic richness (B) across decomposition stages


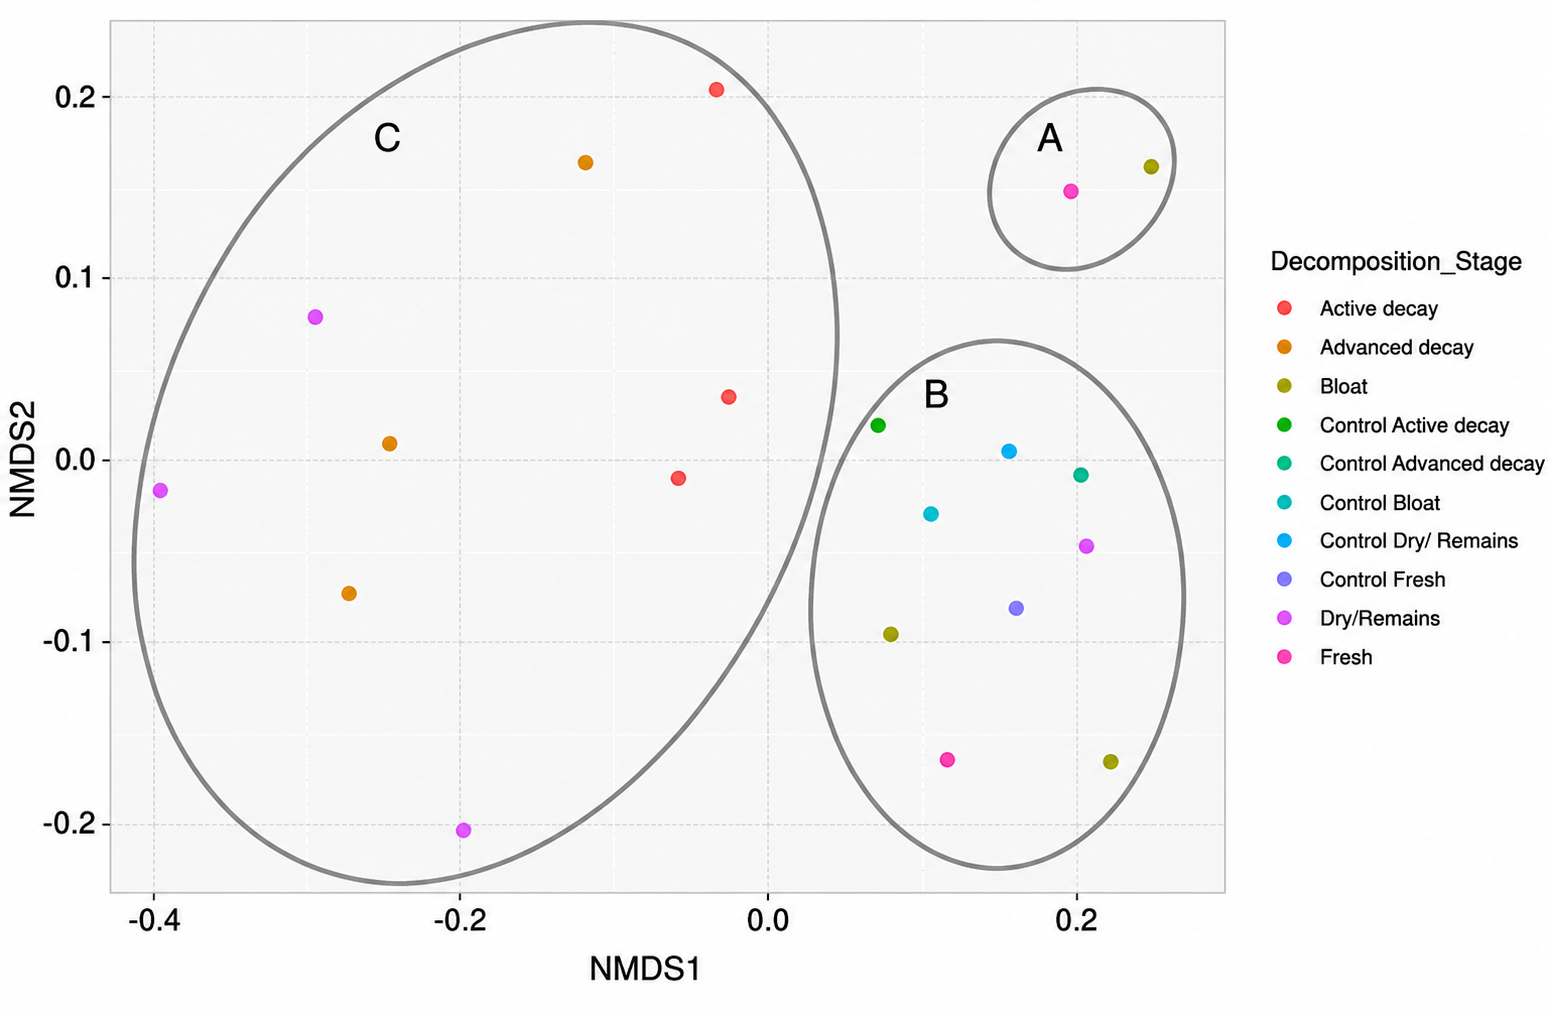


**Supplementary Fig. S2** NMDS ordination based on Bray–Curtis dissimilarity showing fungal community clustering across decomposition stages. Clusters A and B represent fresh-stage, bloat-stage, and control-associated samples, whereas Cluster C represents active decay, advanced decay, and dry/remains samples**.**

**
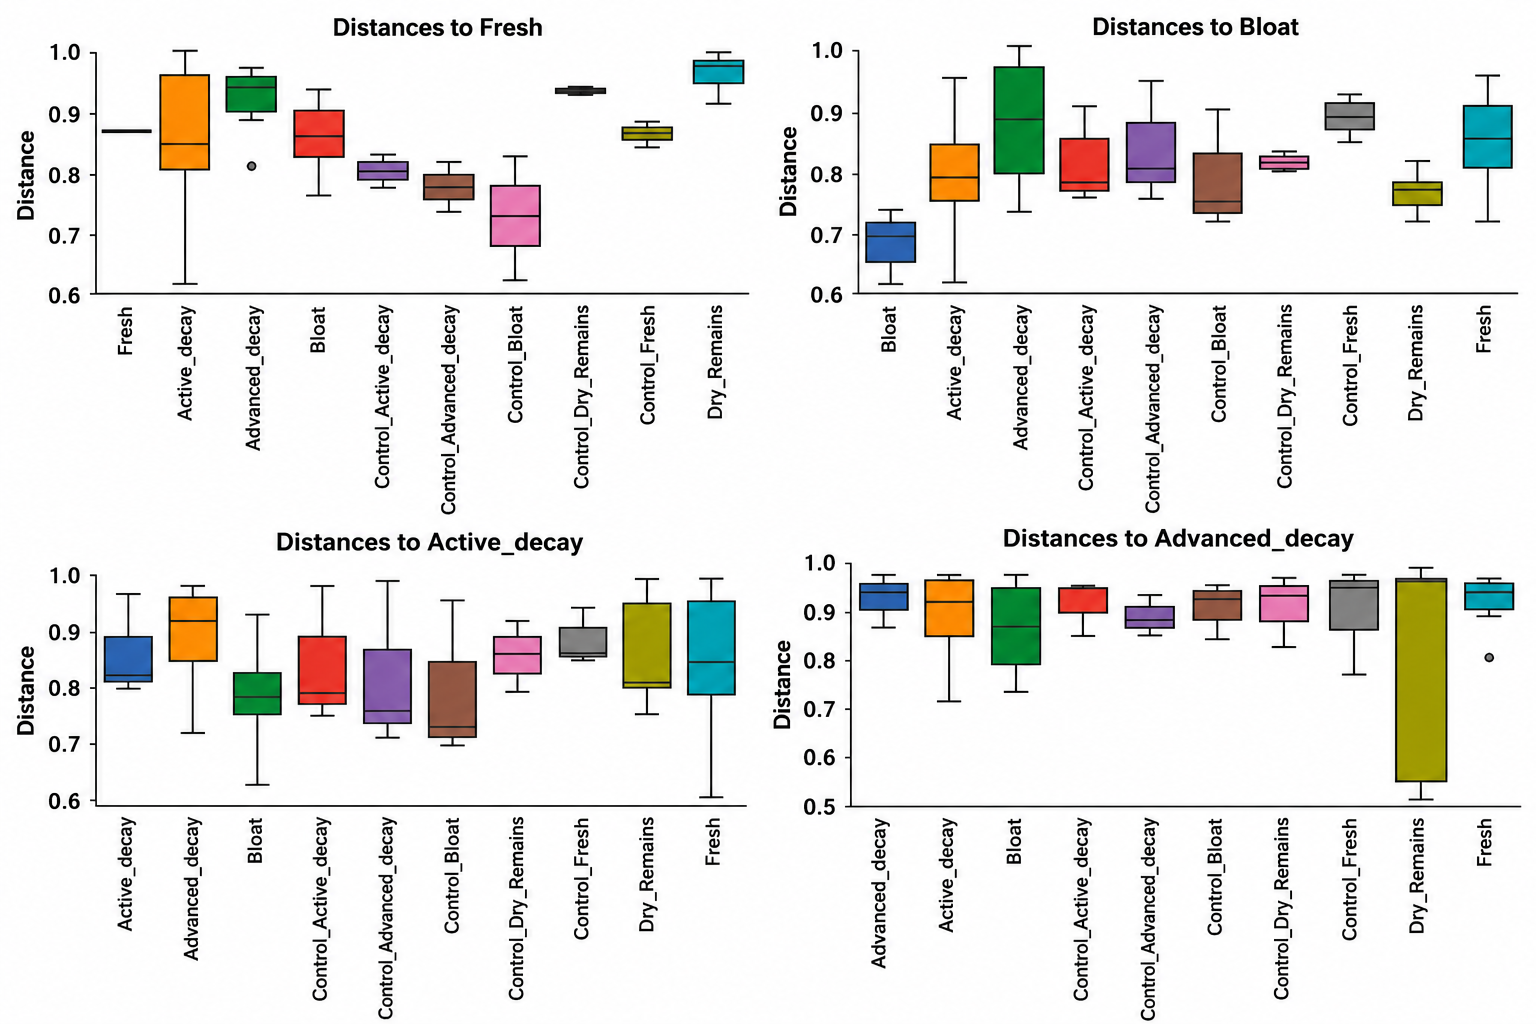
**

**Supplementary Figure S3**: Bray Curtis distance similarity for each of the recorded decomposition stages displayed as boxplots

| 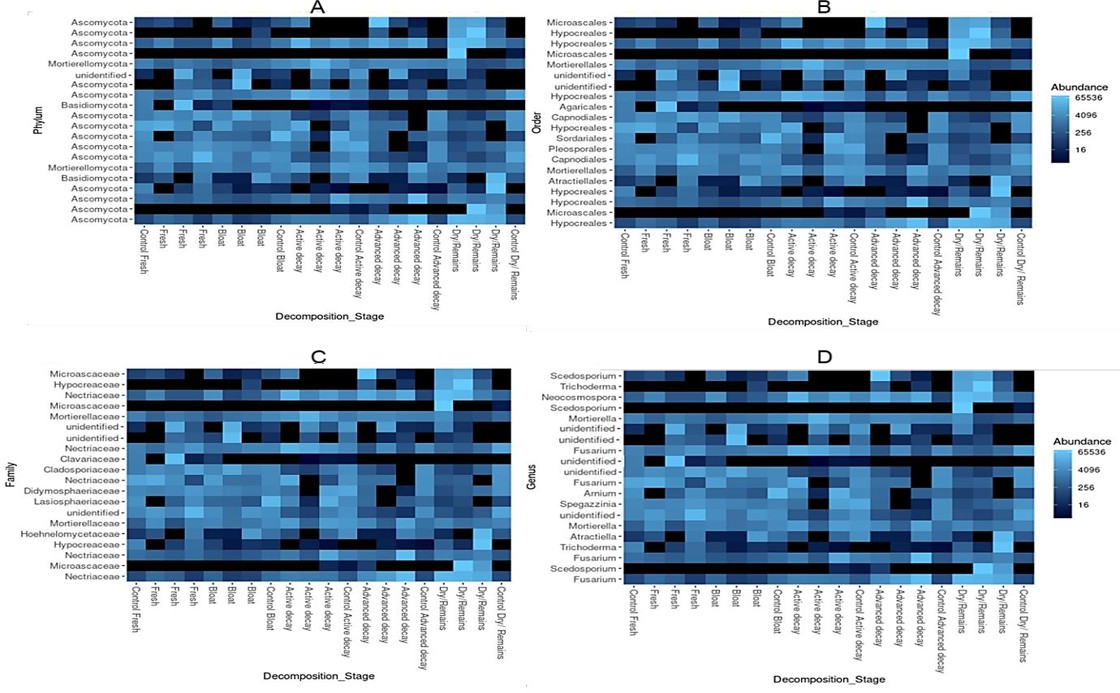 |
| --- |

**Supplementary Figure S4:** Heatmaps of the Top 20 ASVs, Grouped according to Phylum (A), Order (B), Family (C) and Genus (D)


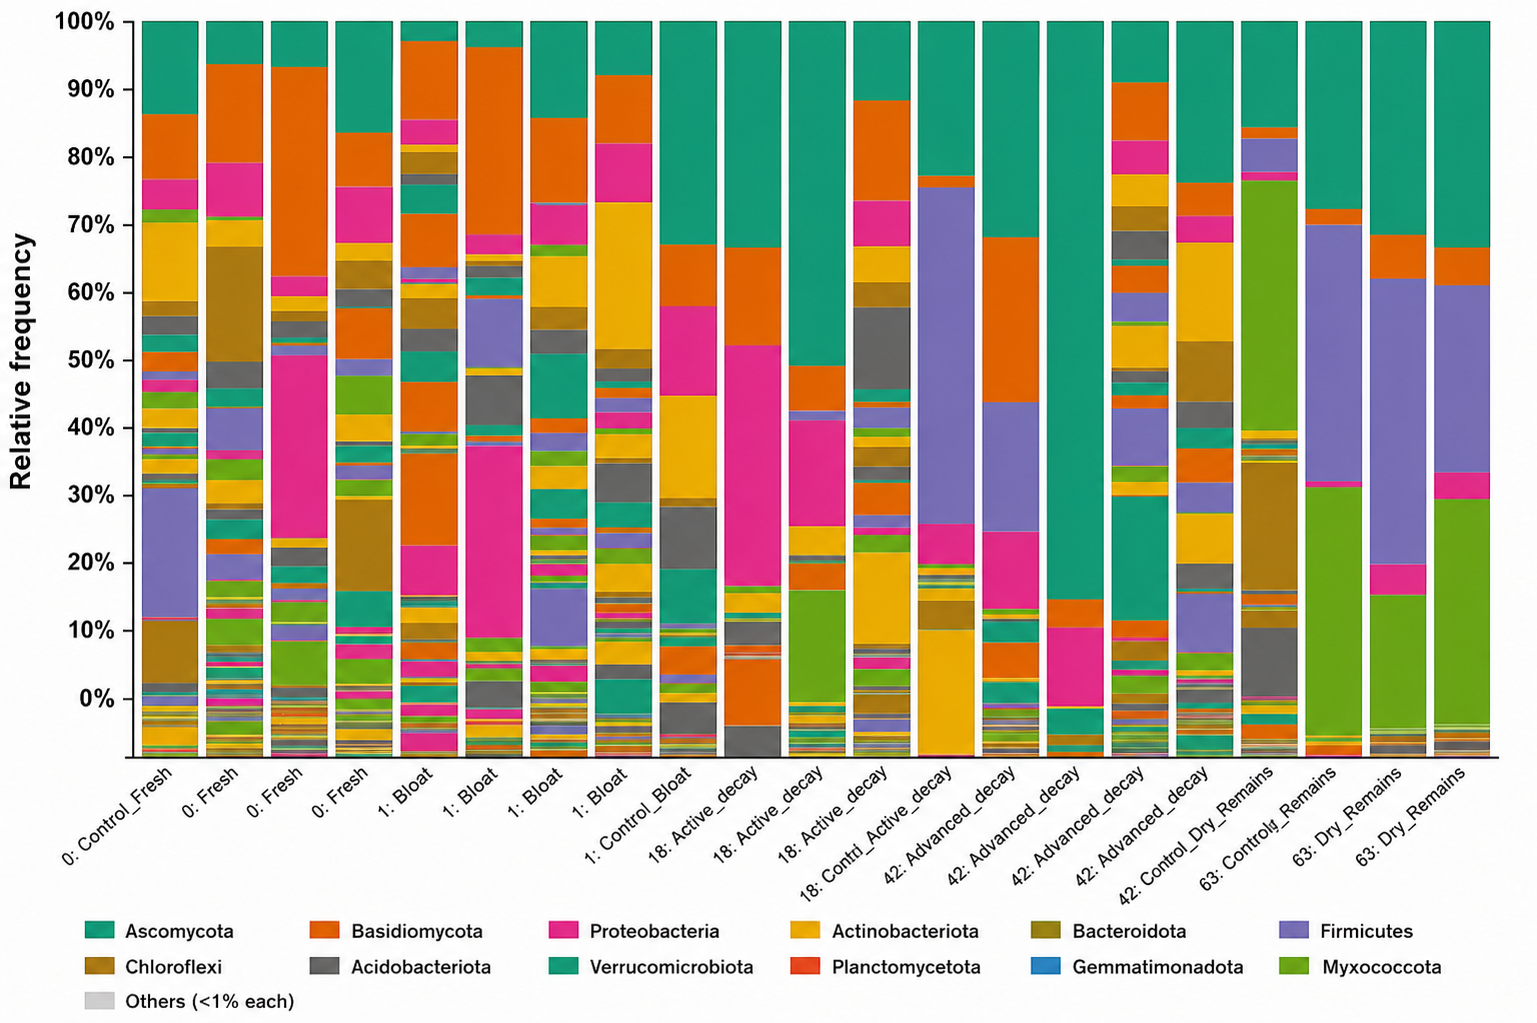


|  |
| --- |

**Supplementary Figure S5**: Bar chart representing distinct family-level relative abundance patterns were observed across decomposition stages.

| 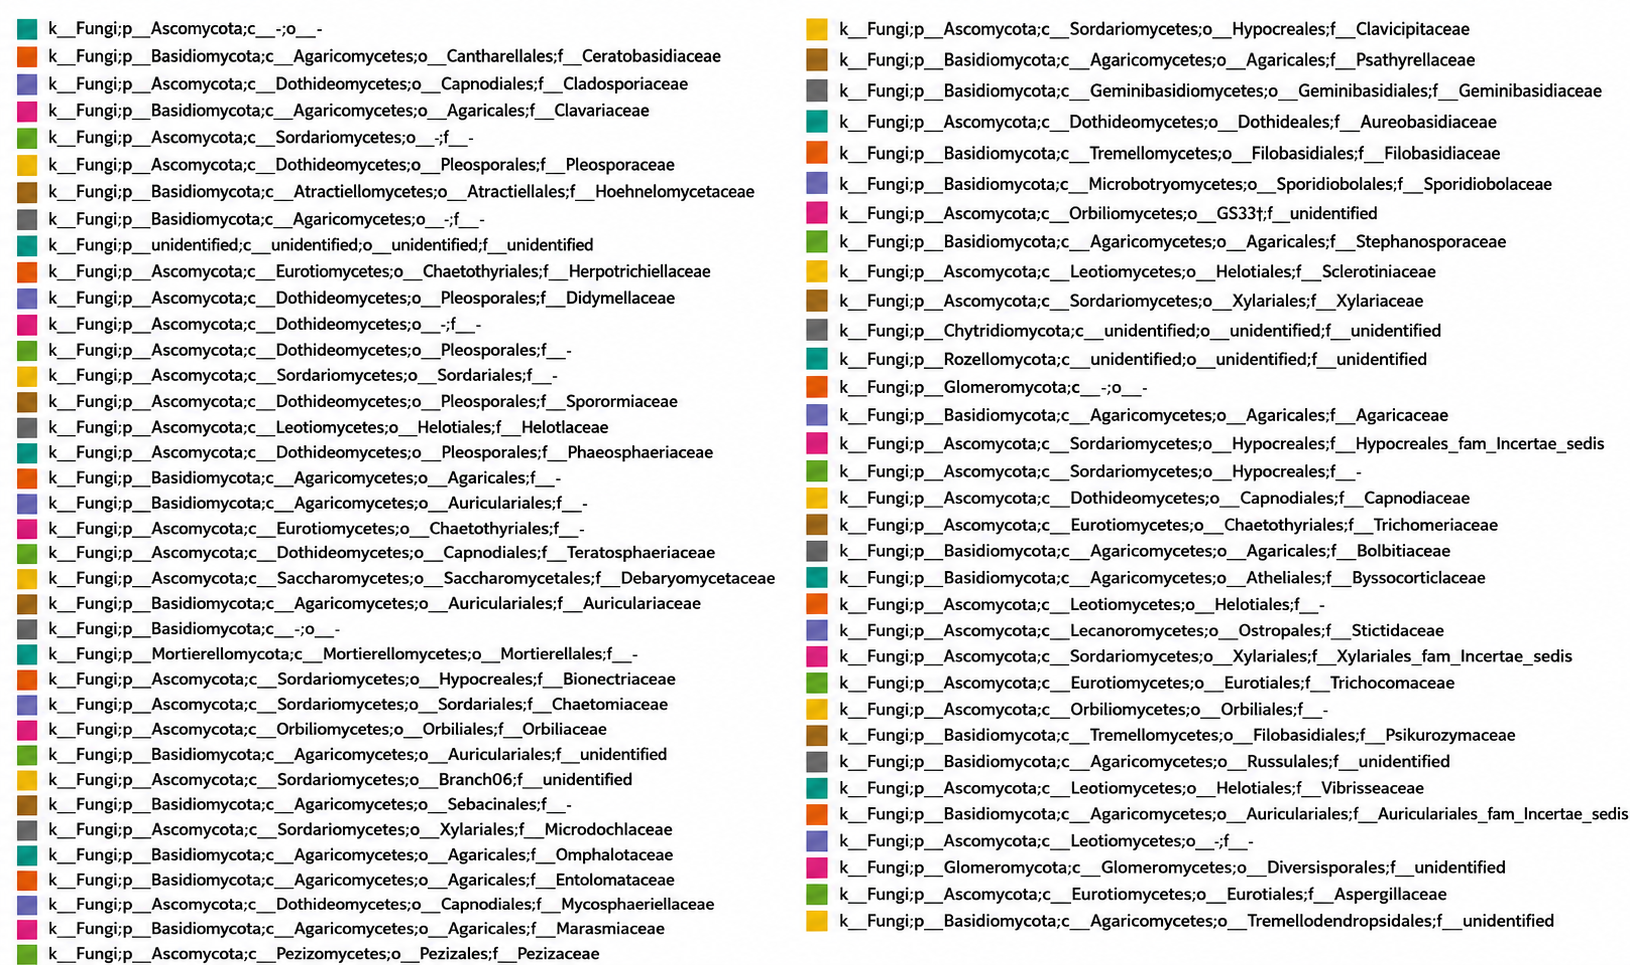 |
| --- |

**Supplementary Figure S6:** Indicator fungal ASVs identified across decomposition stages, showing taxonomic classification and decomposition-stage associations
